# Supplementary material for: Correlation of polymeric compatibilizer structure to its impact on the morphology and function of P3HT:PCBM bulk heterojunctions
Source: Royal Society of Chemistry journal article supplement (doi:10.1039/c3ta10386b), 2013-01-01
Supplement: c3ta10386b.pdf [file c3ta10386b.pdf]

## Supporting Information

### Correlation of Polymeric Compatibilizer Structure to its Impact on the Morphology and Function of P3HT:PCBM Bulk Heterojunctions

By Huipeng Chen, Jihua Chen, Wen Yin, Xiang Yu, Ming Shao, Kai Xiao, Kunlun Hong, Deanna L. Pickel, W. Michael Kochemba, S. Michael Kilbey II, Mark Dadmun\*

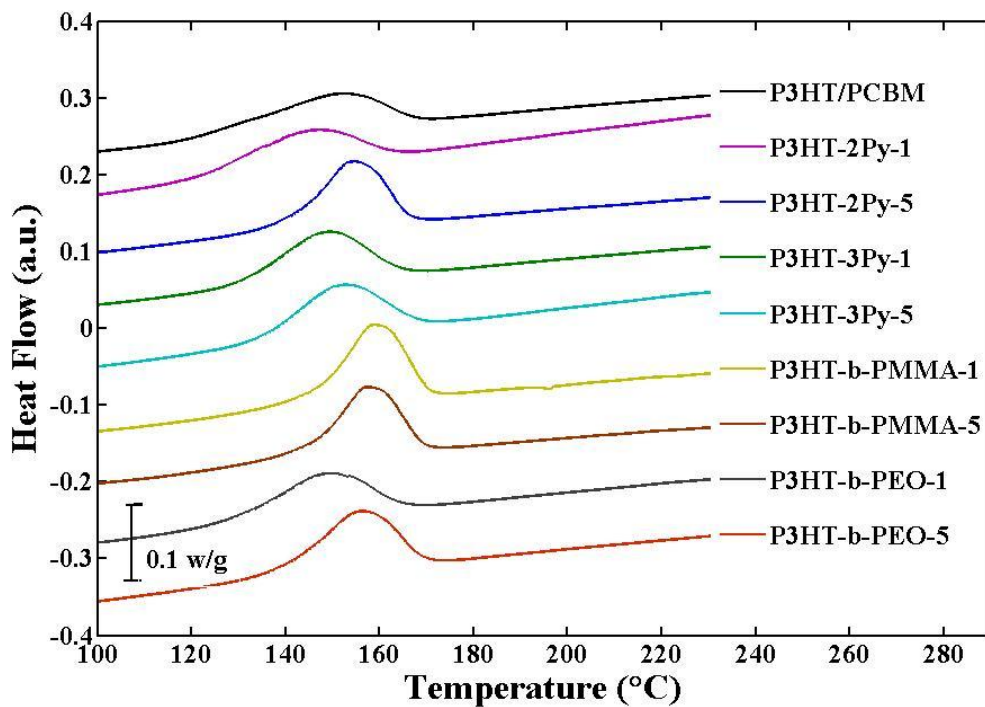

**Figure S1.** Heat flow vs. temperature of all the samples during cooling from the melt (300°C) at 10°C/min. Curves are displaced vertically for clarity.

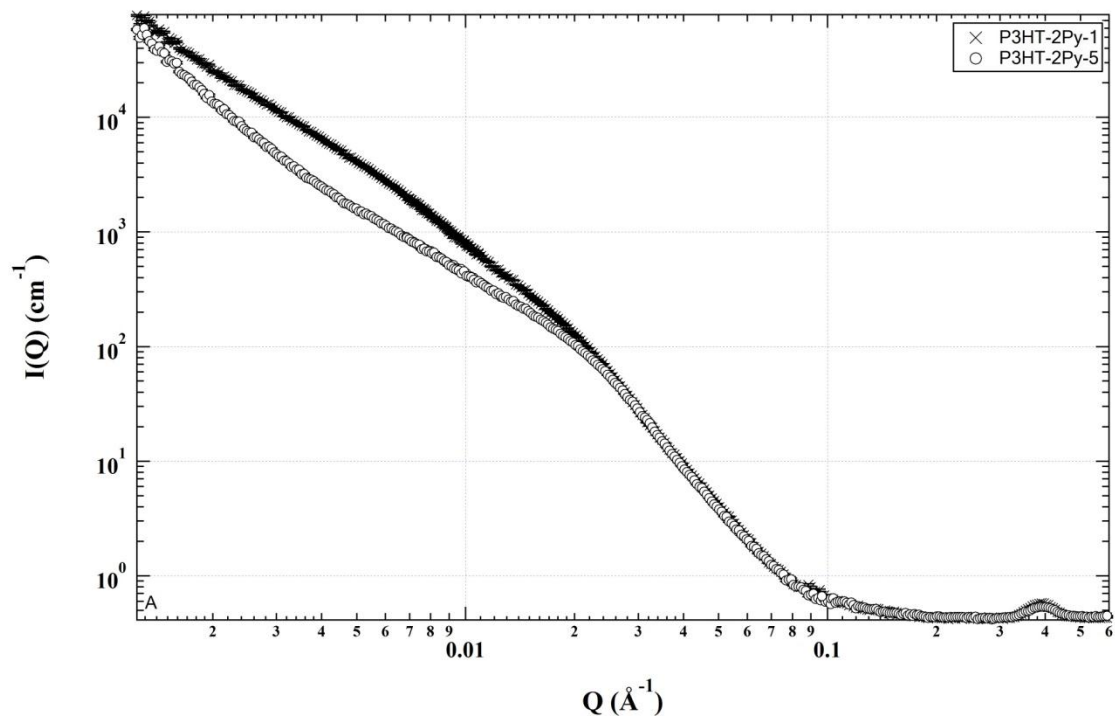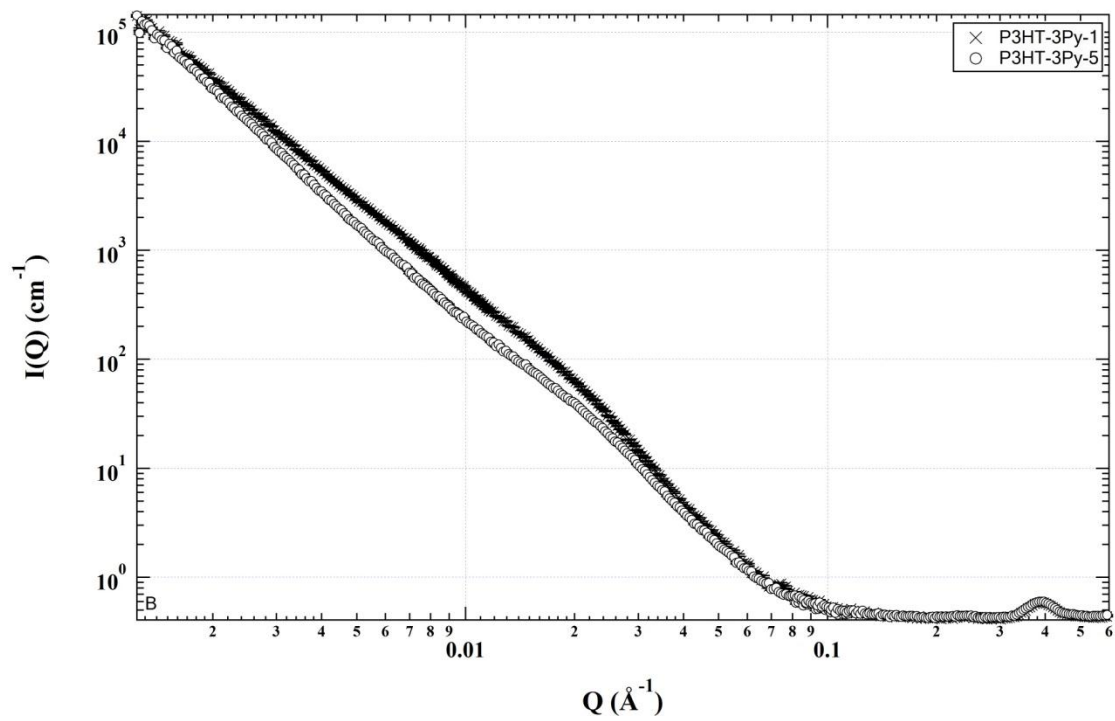

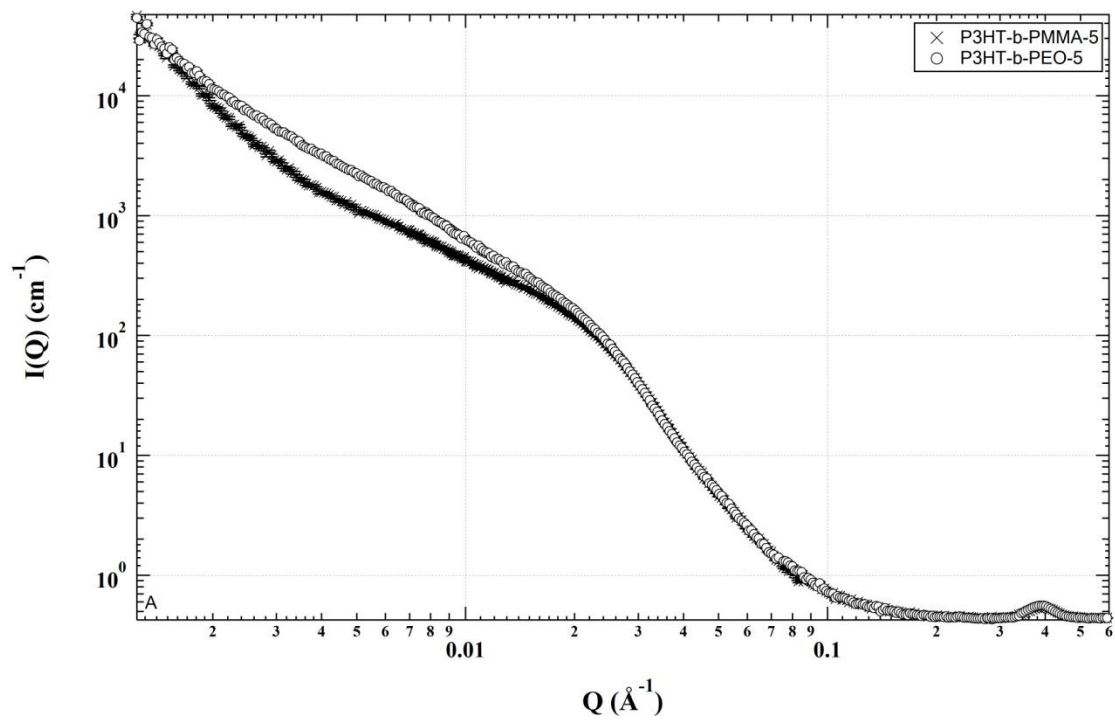

**Figure S2** The absolute SANS intensity of P3HT-2Py-1, P3HT-2Py-5, P3HT-3Py-1, P3HT-3Py-5, P3HT-*b*-PMMA-5, and P3HT-*b*-PEO-5.

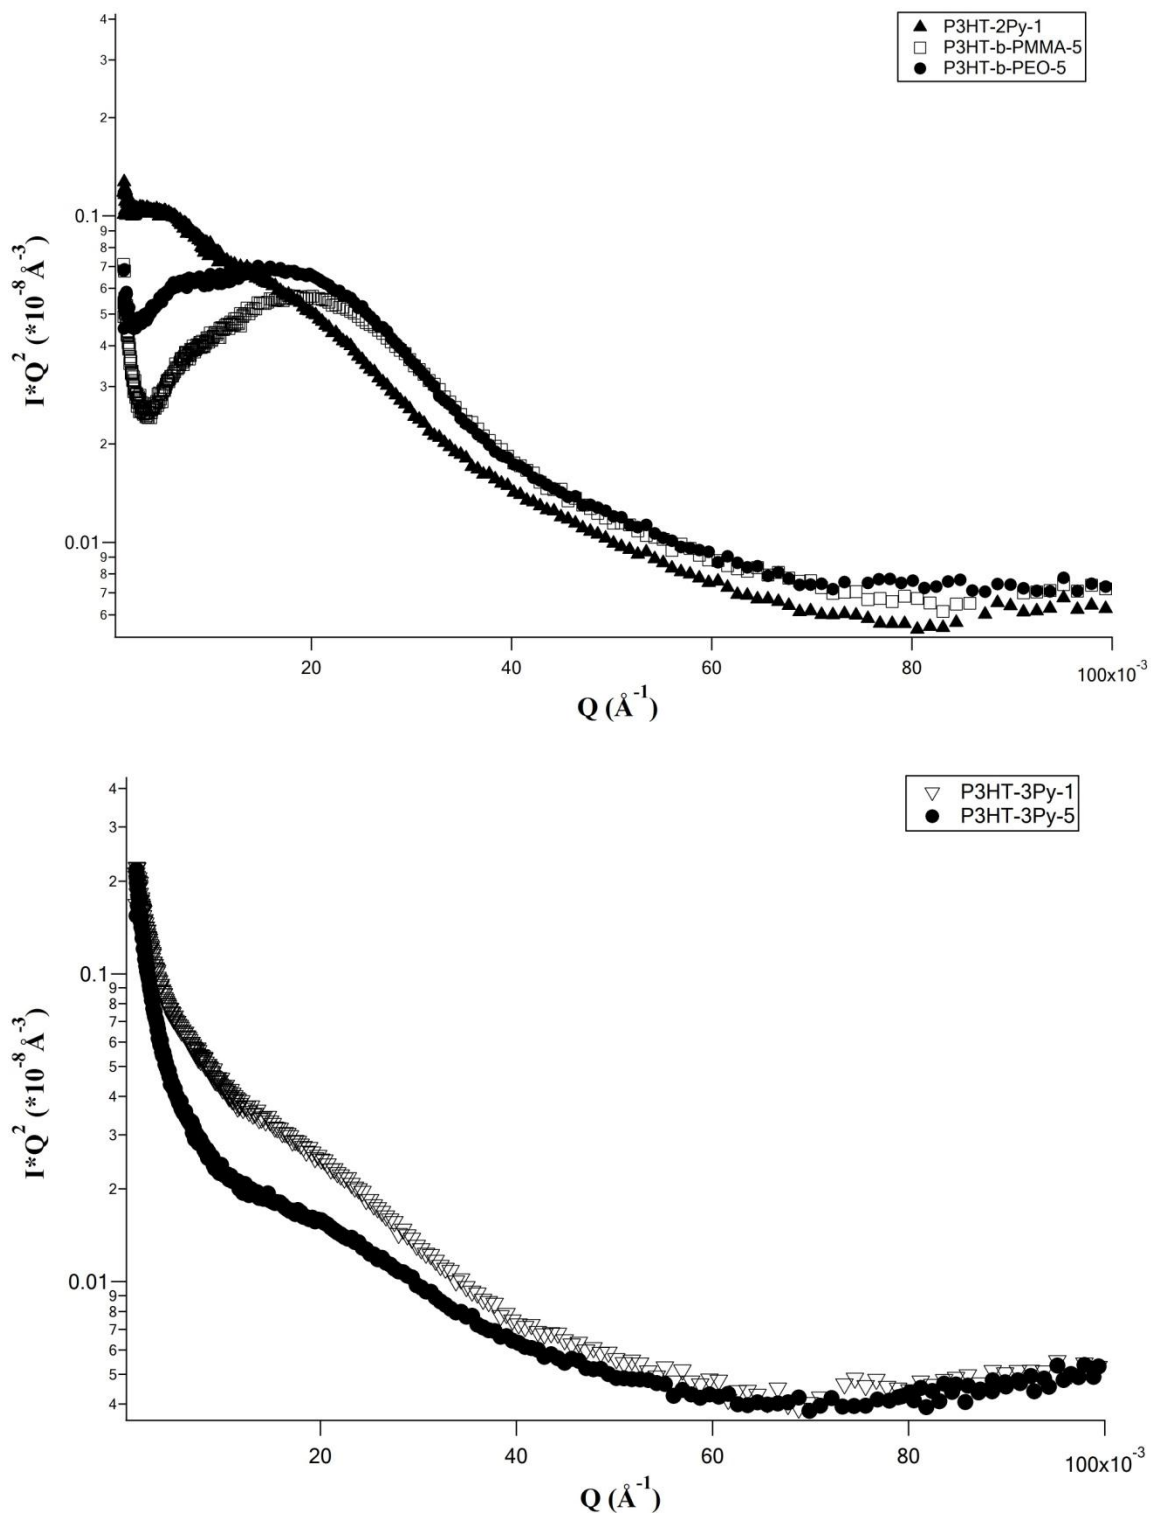

**Figure S3.** Lorentz-corrected scattering pattern of P3HT-2Py-1, P3HT-*b*-PMMA-5, P3HT-*b*-PEO-5, P3HT-3Py-1, and P3HT-3Py-5.

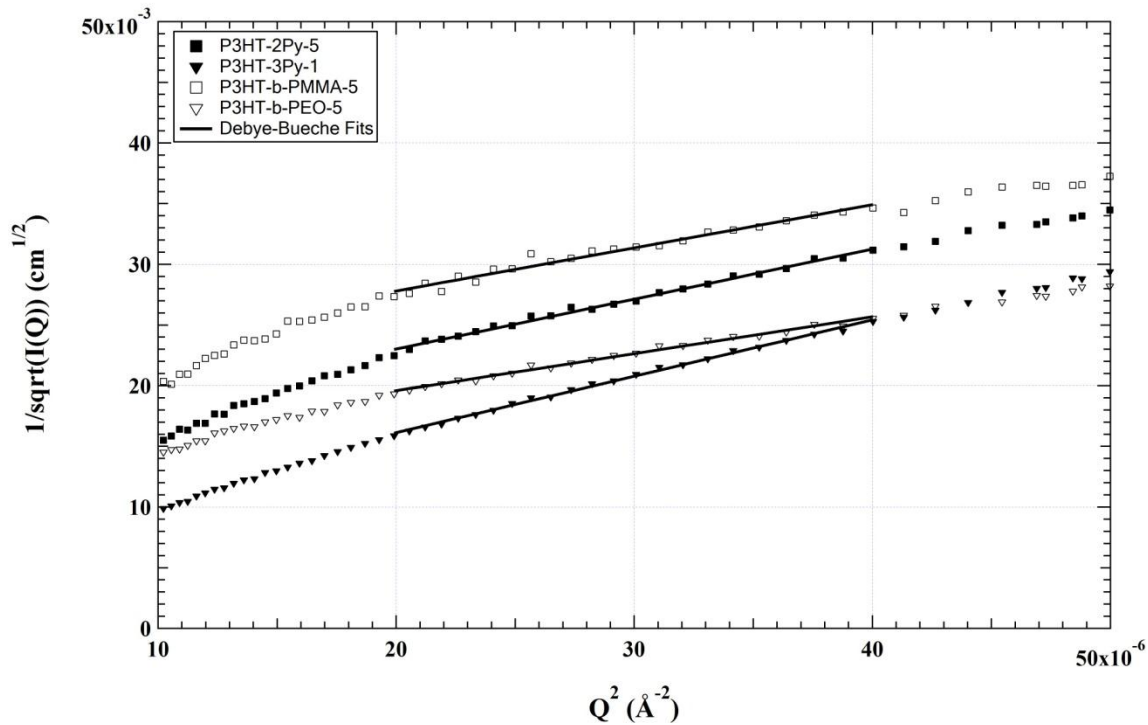

**Figure S4.** Debye-Bueche fits of P3HT-2Py-5, P3HT-3Py-1, P3HT-*b*-PMMA-5, and P3HT-*b*-PEO-5.

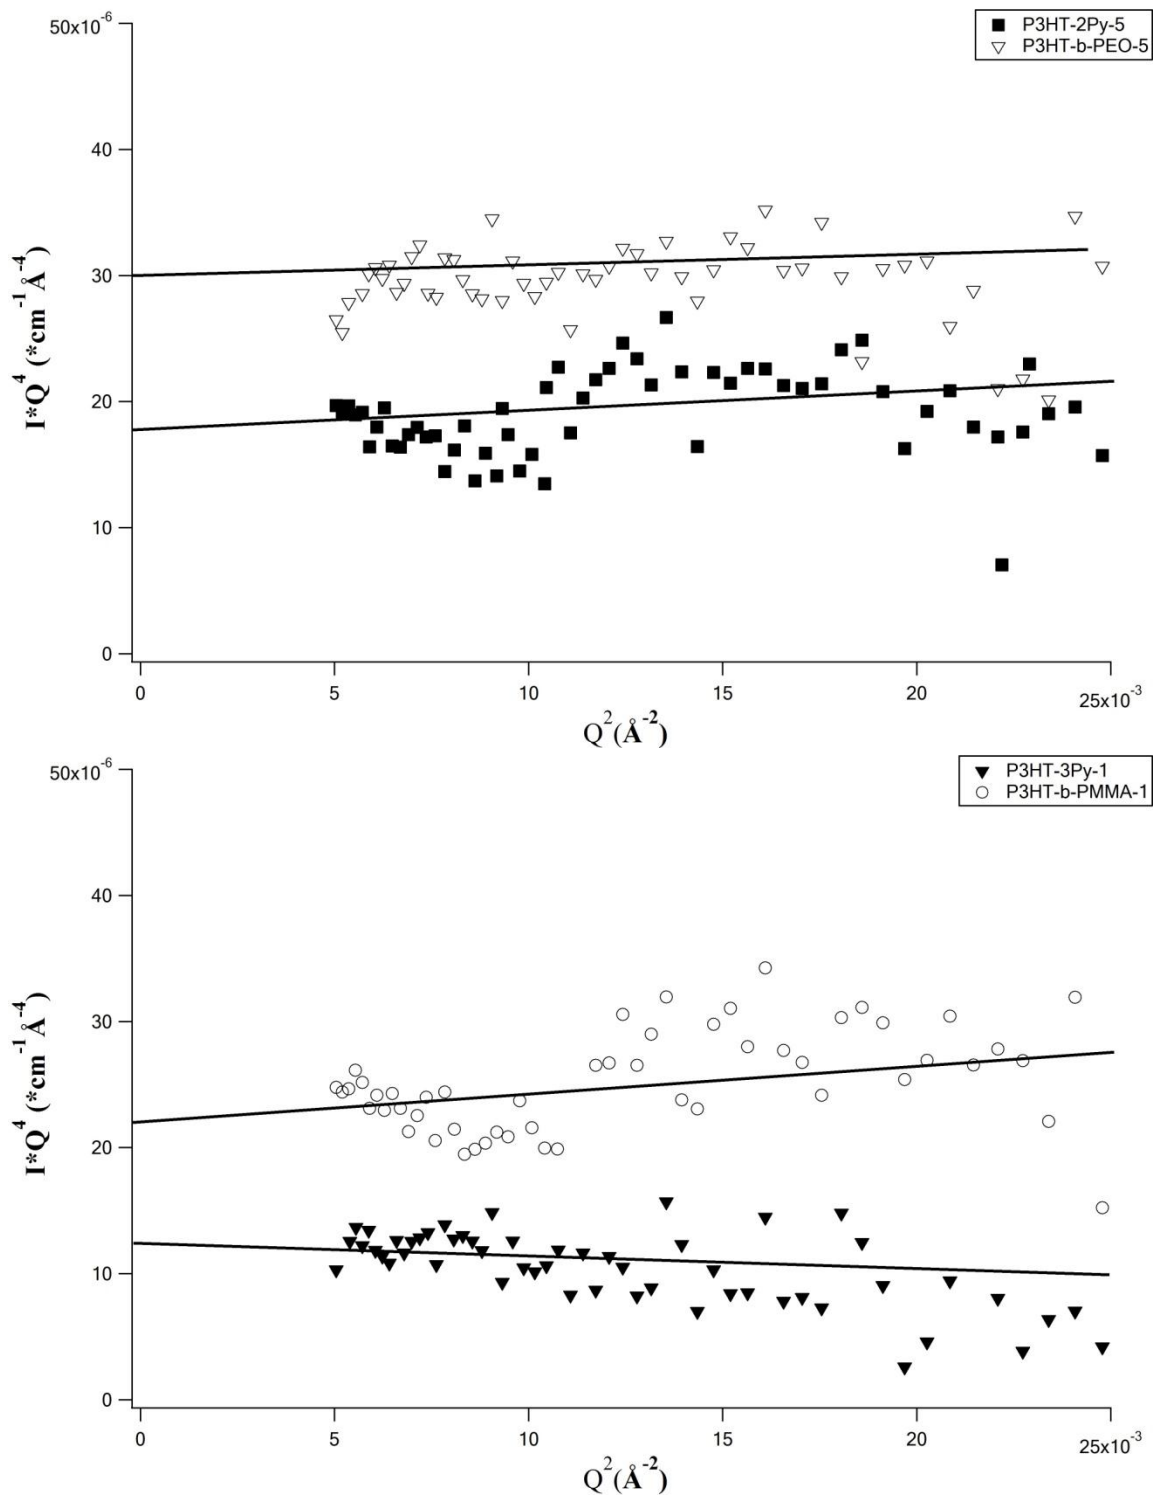

**Figure S5.**  $IQ^4$  vs.  $Q^2$  for P3HT:PCBM, P3HT-2Py-5, P3HT-*b*-PEO-5, P3HT-3Py-1, and P3HT-*b*-PMMA-1. The intercept (A) is used to determine the SLDC,  $\Delta b$ , between the two phases.
